# Supplementary material for: Metalloproteinases and Hypertrophic Cardiomyopathy: A Systematic Review
Source: MDPI journal article supplement (doi:10.3390/biom13040665), 2023-04-11
Supplement: s1 [file s1]

## **Supplemental Material**

### **Metalloproteinases and hypertrophic cardiomyopathy: a systematic review**

#### **Supplemental Figures**

Figure 1. Preferred Reporting Items for Systematic Reviews and Meta-Analyses (PRISMA) flow diagram.....pag. 2

#### **Supplemental Tables**

Table 1. PICO criteria for inclusion and exclusion of studies.....pag. 4

Table 2. Quality scoring for included papers using Newcastle-Ottawa Scale (NOS)..... pag. 4

Table 3. Characteristics of excluded studies.....pag. 5

**Figure 1.** Preferred Reporting Items for Systematic Reviews and Meta-Analyses (PRISMA) flow diagram.

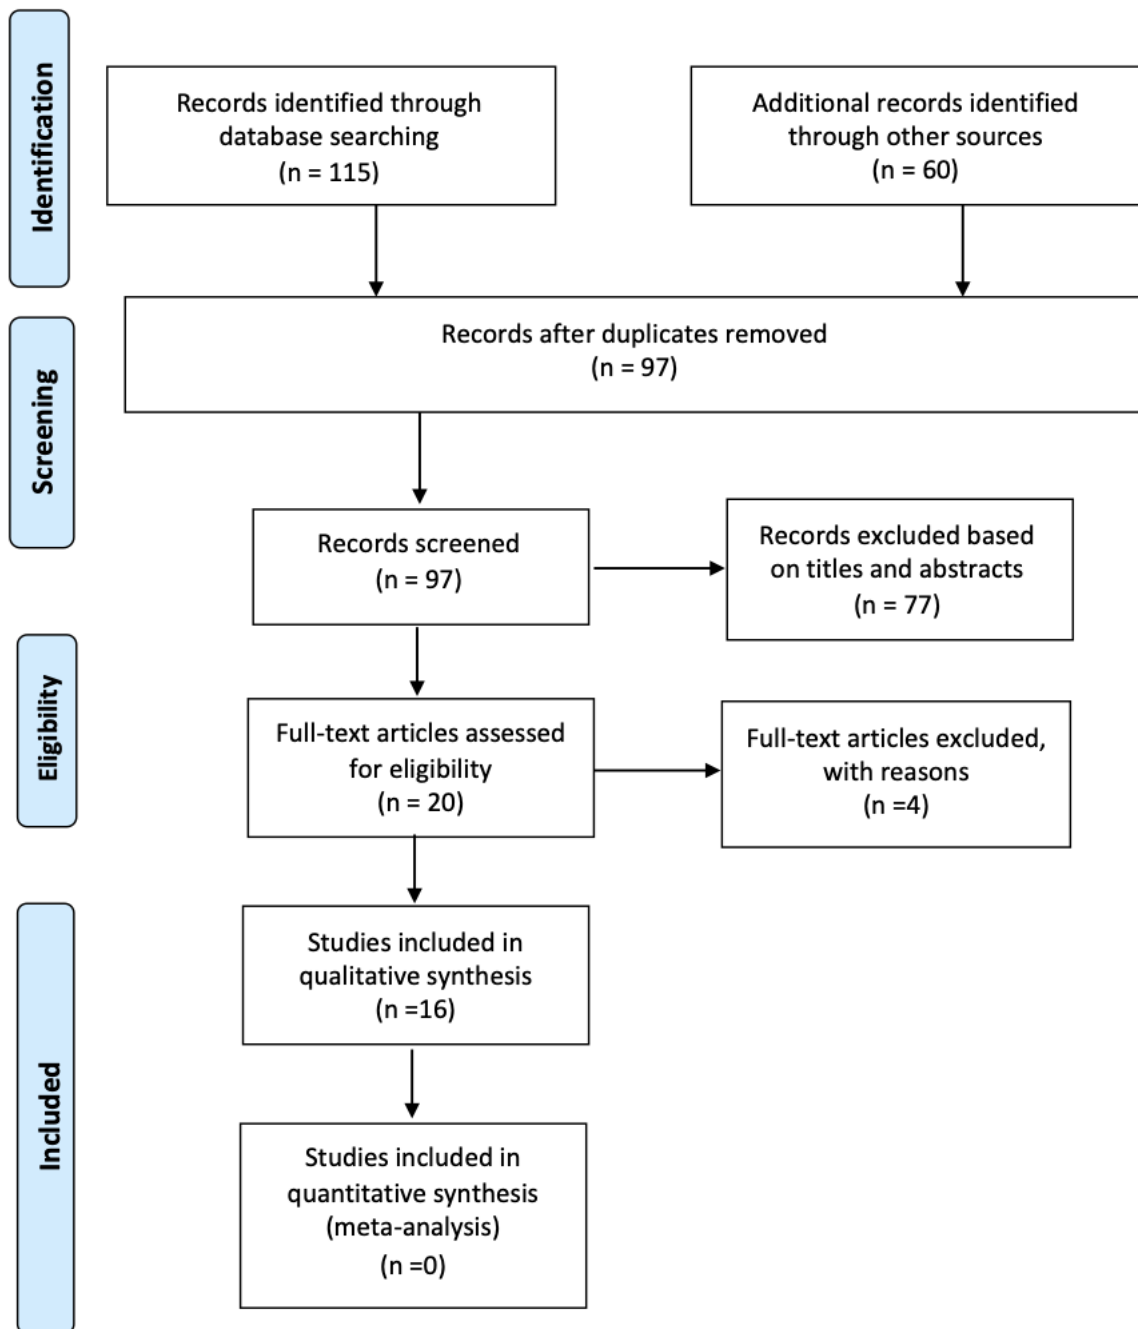

**Table 1. PICO criteria for inclusion and exclusion of studies**

| Parameter                         | Inclusion criteria                       | Exclusion criteria |
|-----------------------------------|------------------------------------------|--------------------|
| <i>Population/Patient/Problem</i> | Patient with hypertrophic cardiomyopathy | -                  |
| <i>Interest</i>                   | Metalloproteinases analysis              | -                  |
| <i>Context</i>                    | Hypertrophic cardiomyopathy              | -                  |

**Table 2. Quality scoring for included papers using Newcastle-Ottawa Scale**

| Study<br>(Author, Year)     | Selection | Comparability | Outcome | Exposure | Total |
|-----------------------------|-----------|---------------|---------|----------|-------|
| <i>Bradham, 2002 [10]</i>   | 3         | -             | 1       | —        | 4     |
| <i>Lombardi, 2003 [11]</i>  | 4         | 2             | 1       | —        | 7     |
| <i>Fassbach, 2004 [12]</i>  | 4         | 2             | 1       | —        | 7     |
| <i>Noji, 2004 [13]</i>      | 4         | 2             | 1       | —        | 7     |
| <i>Stroud, 2005 [14]</i>    | 4         | 2             | 1       | —        | 7     |
| <i>Roldàn, 2008 [15]</i>    | 4         | 2             | 1       | —        | 7     |
| <i>Saura, 2009 [16]</i>     | 3         | -             | 1       | —        | 4     |
| <i>Kitaoka 2010 [17]</i>    | 3         | -             | 1       | —        | 4     |
| <i>Kitaoka, 2011 [18]</i>   | 3         | -             | 1       | —        | 4     |
| <i>Zachariah, 2012 [19]</i> | 2         | -             | 1       | —        | 3     |
| <i>Fucikova, 2016 [20]</i>  | 4         | 2             | 1       | —        | 7     |
| <i>Munch, 2016 [21]</i>     | 2         | -             | 1       | —        | 3     |
| <i>Fernlund, 2017 [22]</i>  | 4         | 2             | 1       | —        | 7     |
| <i>Yang, 2019 [23]</i>      | 3         | -             | 1       | —        | 4     |
| <i>Qian, 2020 [24]</i>      | 3         | -             | 2       | —        | 5     |
| <i>Bi, 2021 [25]</i>        | 3         | -             | 1       | —        | 4     |

A study can be awarded a maximum of 4 points for the Selection category, 2 points for the comparability category and 3 points for the Outcome/Exposure categories. Therefore, the maximum points a study can obtain is 9 which indicates a high-quality study.

**Table 3. Characteristics of excluded studies**

| Study, year<br>[Ref]   | Type of study                        | Population              | Metalloproteinase                                | Outcomes                                                                                                                                                                                  | Main findings                                                                   | Reason<br>for<br>exclusion |
|------------------------|--------------------------------------|-------------------------|--------------------------------------------------|-------------------------------------------------------------------------------------------------------------------------------------------------------------------------------------------|---------------------------------------------------------------------------------|----------------------------|
| Masutomo,<br>2001 [26] | Prospective<br>observational<br>NRCT | Male syrian<br>hamsters | MMP-1, MMP-2,<br>MMP-3, MMP-9,<br>TIMP-1, TIMP-2 | To analyze the effects of AT1<br>receptor blockade in response to<br>losartan, on extracellular matrix<br>degradation process in models of<br>hypertrophic and dilated<br>cardiomyopathy. | MMPs and<br>TIMPs seem to<br>be susceptible to<br>responding to<br>losartan.    | Animal<br>model            |
| Chiu, 2006<br>[27]     | Prospective<br>observational<br>NRCT | Cats                    | MMP-2, MMP-9                                     | To investigate the effects of a<br>higher dose of norepinephrine on<br>cardiac remodeling.                                                                                                | MMP-9 activity<br>was elevated,<br>while MMP-2<br>activity was<br>unchanged.    | Animal<br>model            |
| Kitz, 2019<br>[28]     | Prospective<br>observational<br>NRCT | Cats                    | MMP-2, MMP-3,<br>MMP-13, TIMP-2                  | To analyze the pathogenesis of<br>HOCM.                                                                                                                                                   | A negative<br>correlation for<br>MMP-2, MMP-<br>13 and age in<br>HOCM subjects. | Animal<br>model            |
| Lim, 2021<br>[29]      | Prospective<br>observational<br>NRCT | Mice                    | MMP-2, MMP-3                                     | To assess the atrial structural and<br>electrophysiological alterations and<br>blood biomarkers in HOCM<br>subjects.                                                                      | Increased MMPs<br>levels in older<br>mice.                                      | Animal<br>model            |
